# Supplementary material
Source: publisher site journal article supplement (https://www.dovepress.com/article/397327)
Supplement: Supplementary file 1 [file get_supplementary_file.php]

**SUPPLEMENTARY FIGURES LEGENDS**

**SUPPLEMENTARY FIGURE 1 |** AKT1 shRNA sequencing results.

**SUPPLEMENTARY FIGURE 2 |** AKT overexpression plasmid construction. **(A)** CMV-MCS-IRES-EGFP-SV40-Neomycin vector structural overview. **(B)** Vector digestion product and target fragment PCR results. **(C)** Recombinant vector and target fragment cloning results.

**SUPPLEMENTARY TABLE S1-2 |** AKT1 target sequence and shRNA sequence.


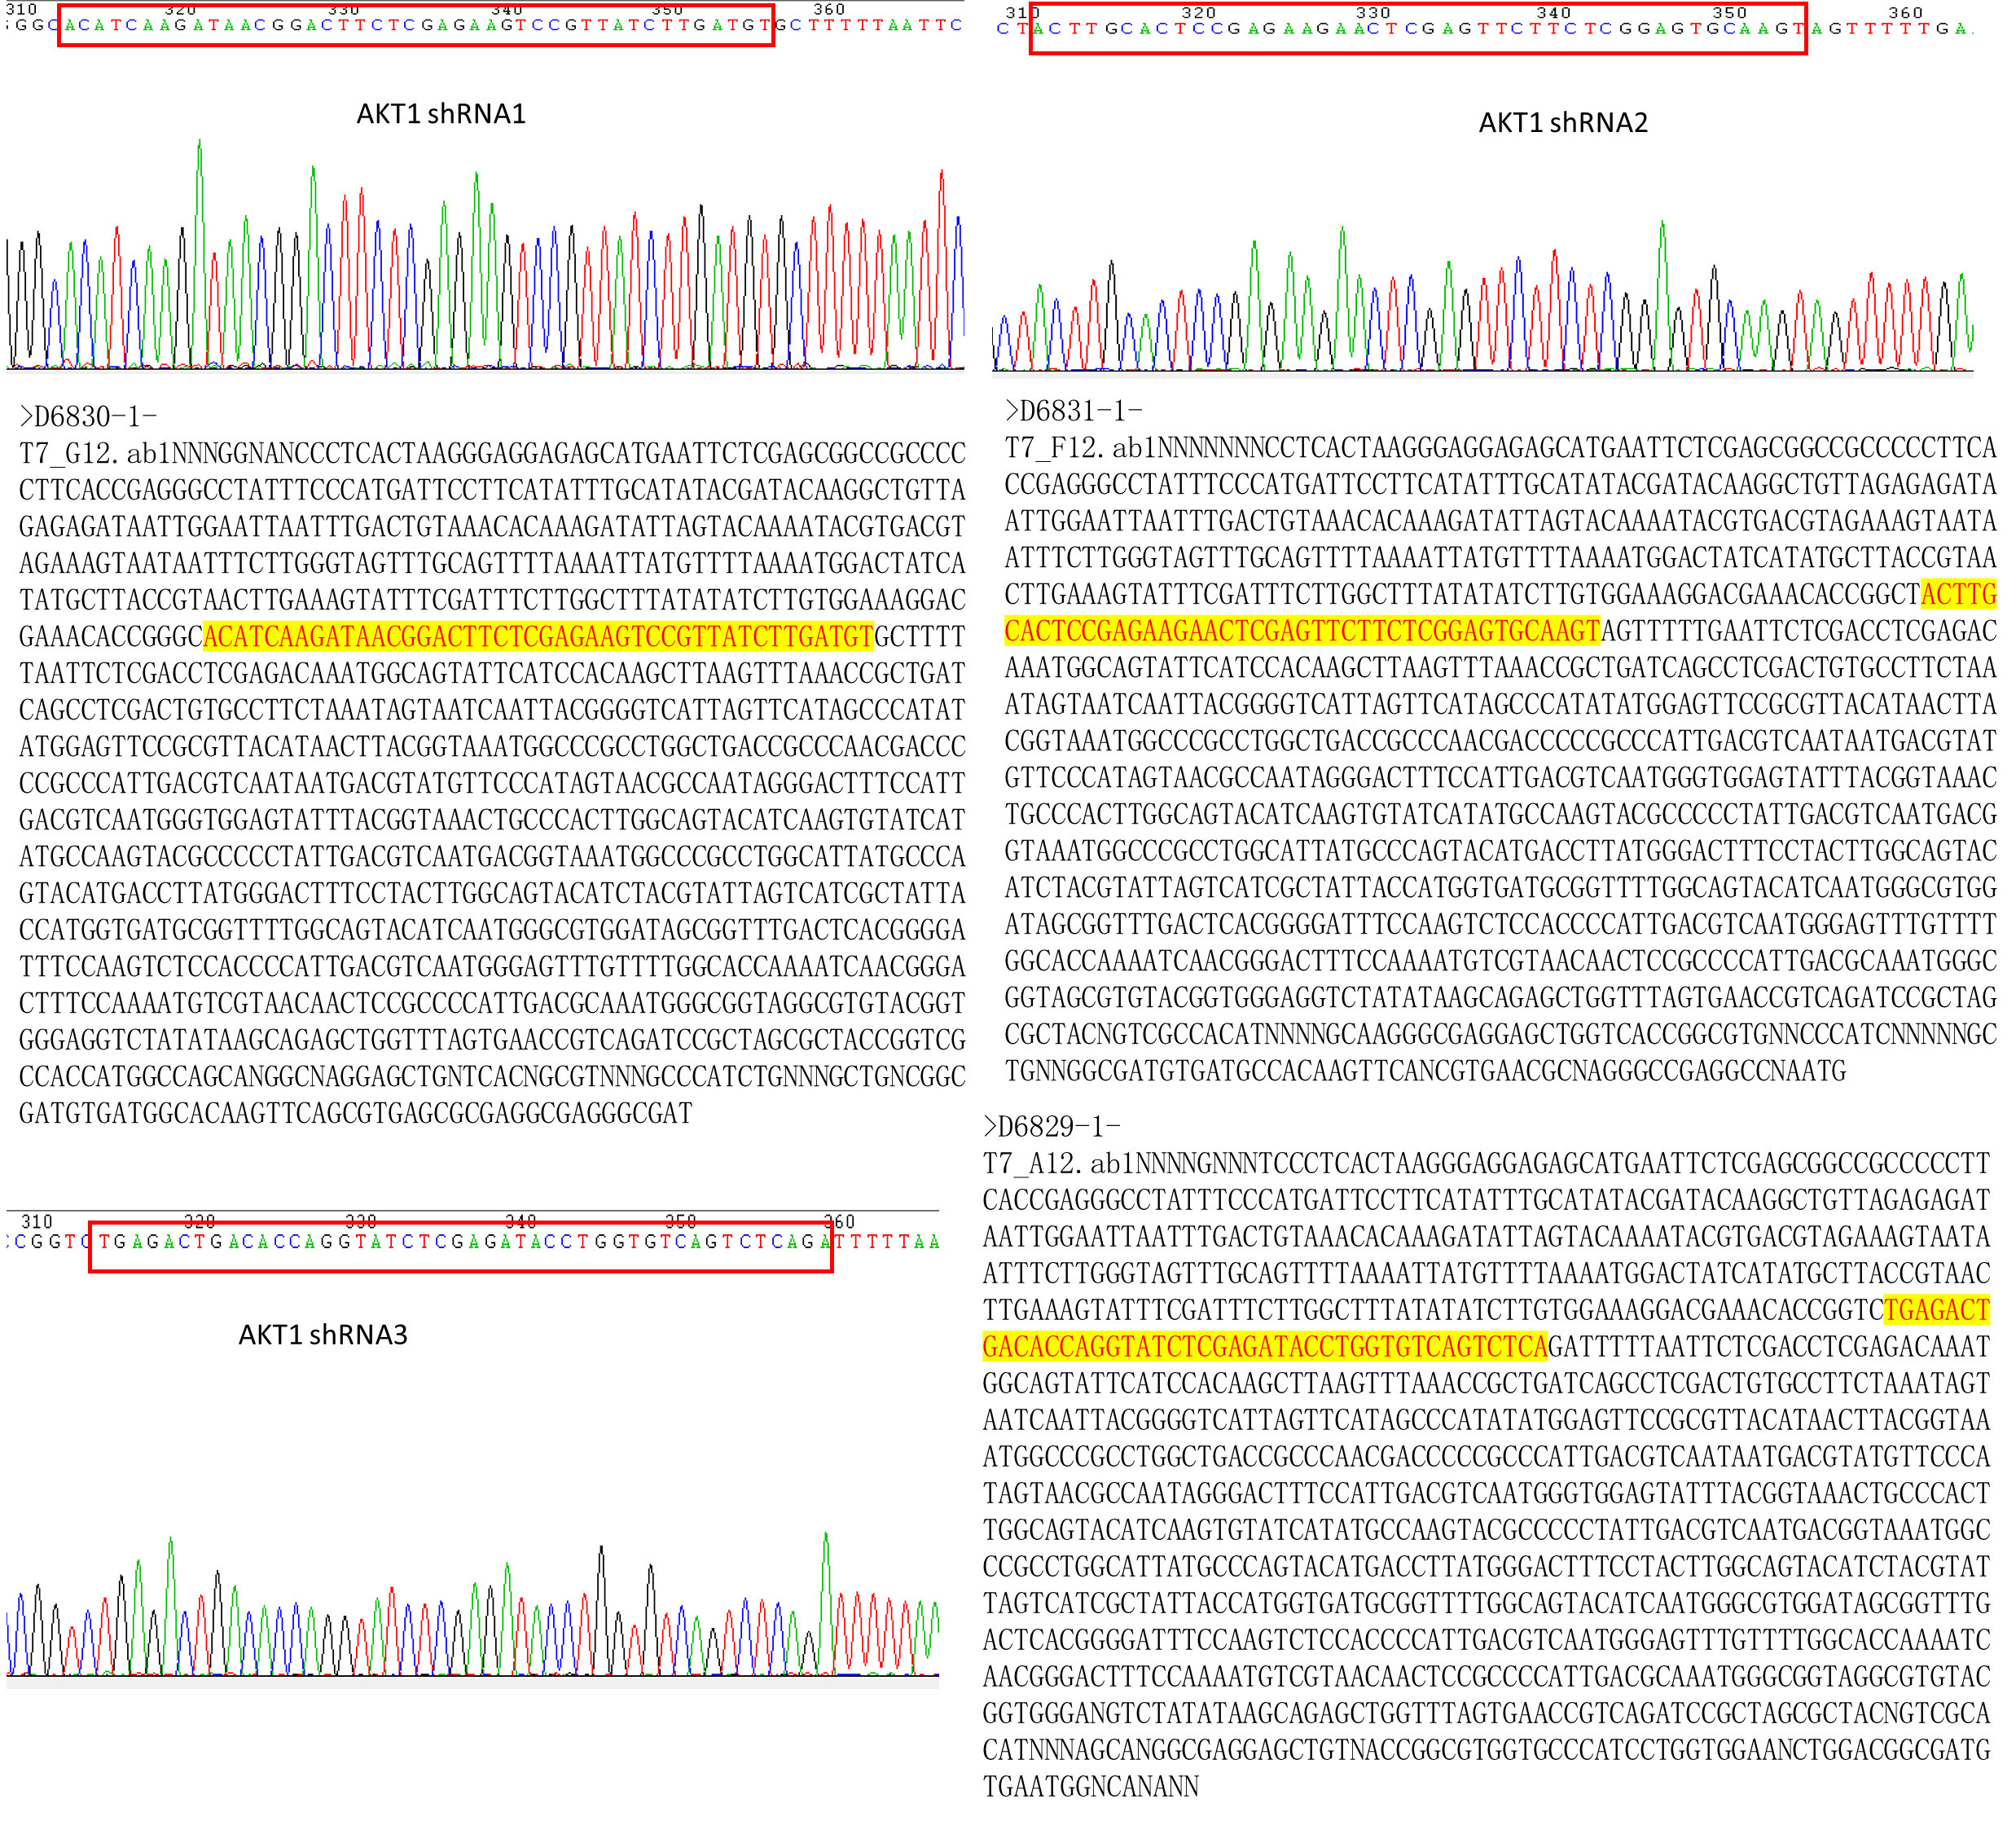


Supplementary Fig.1


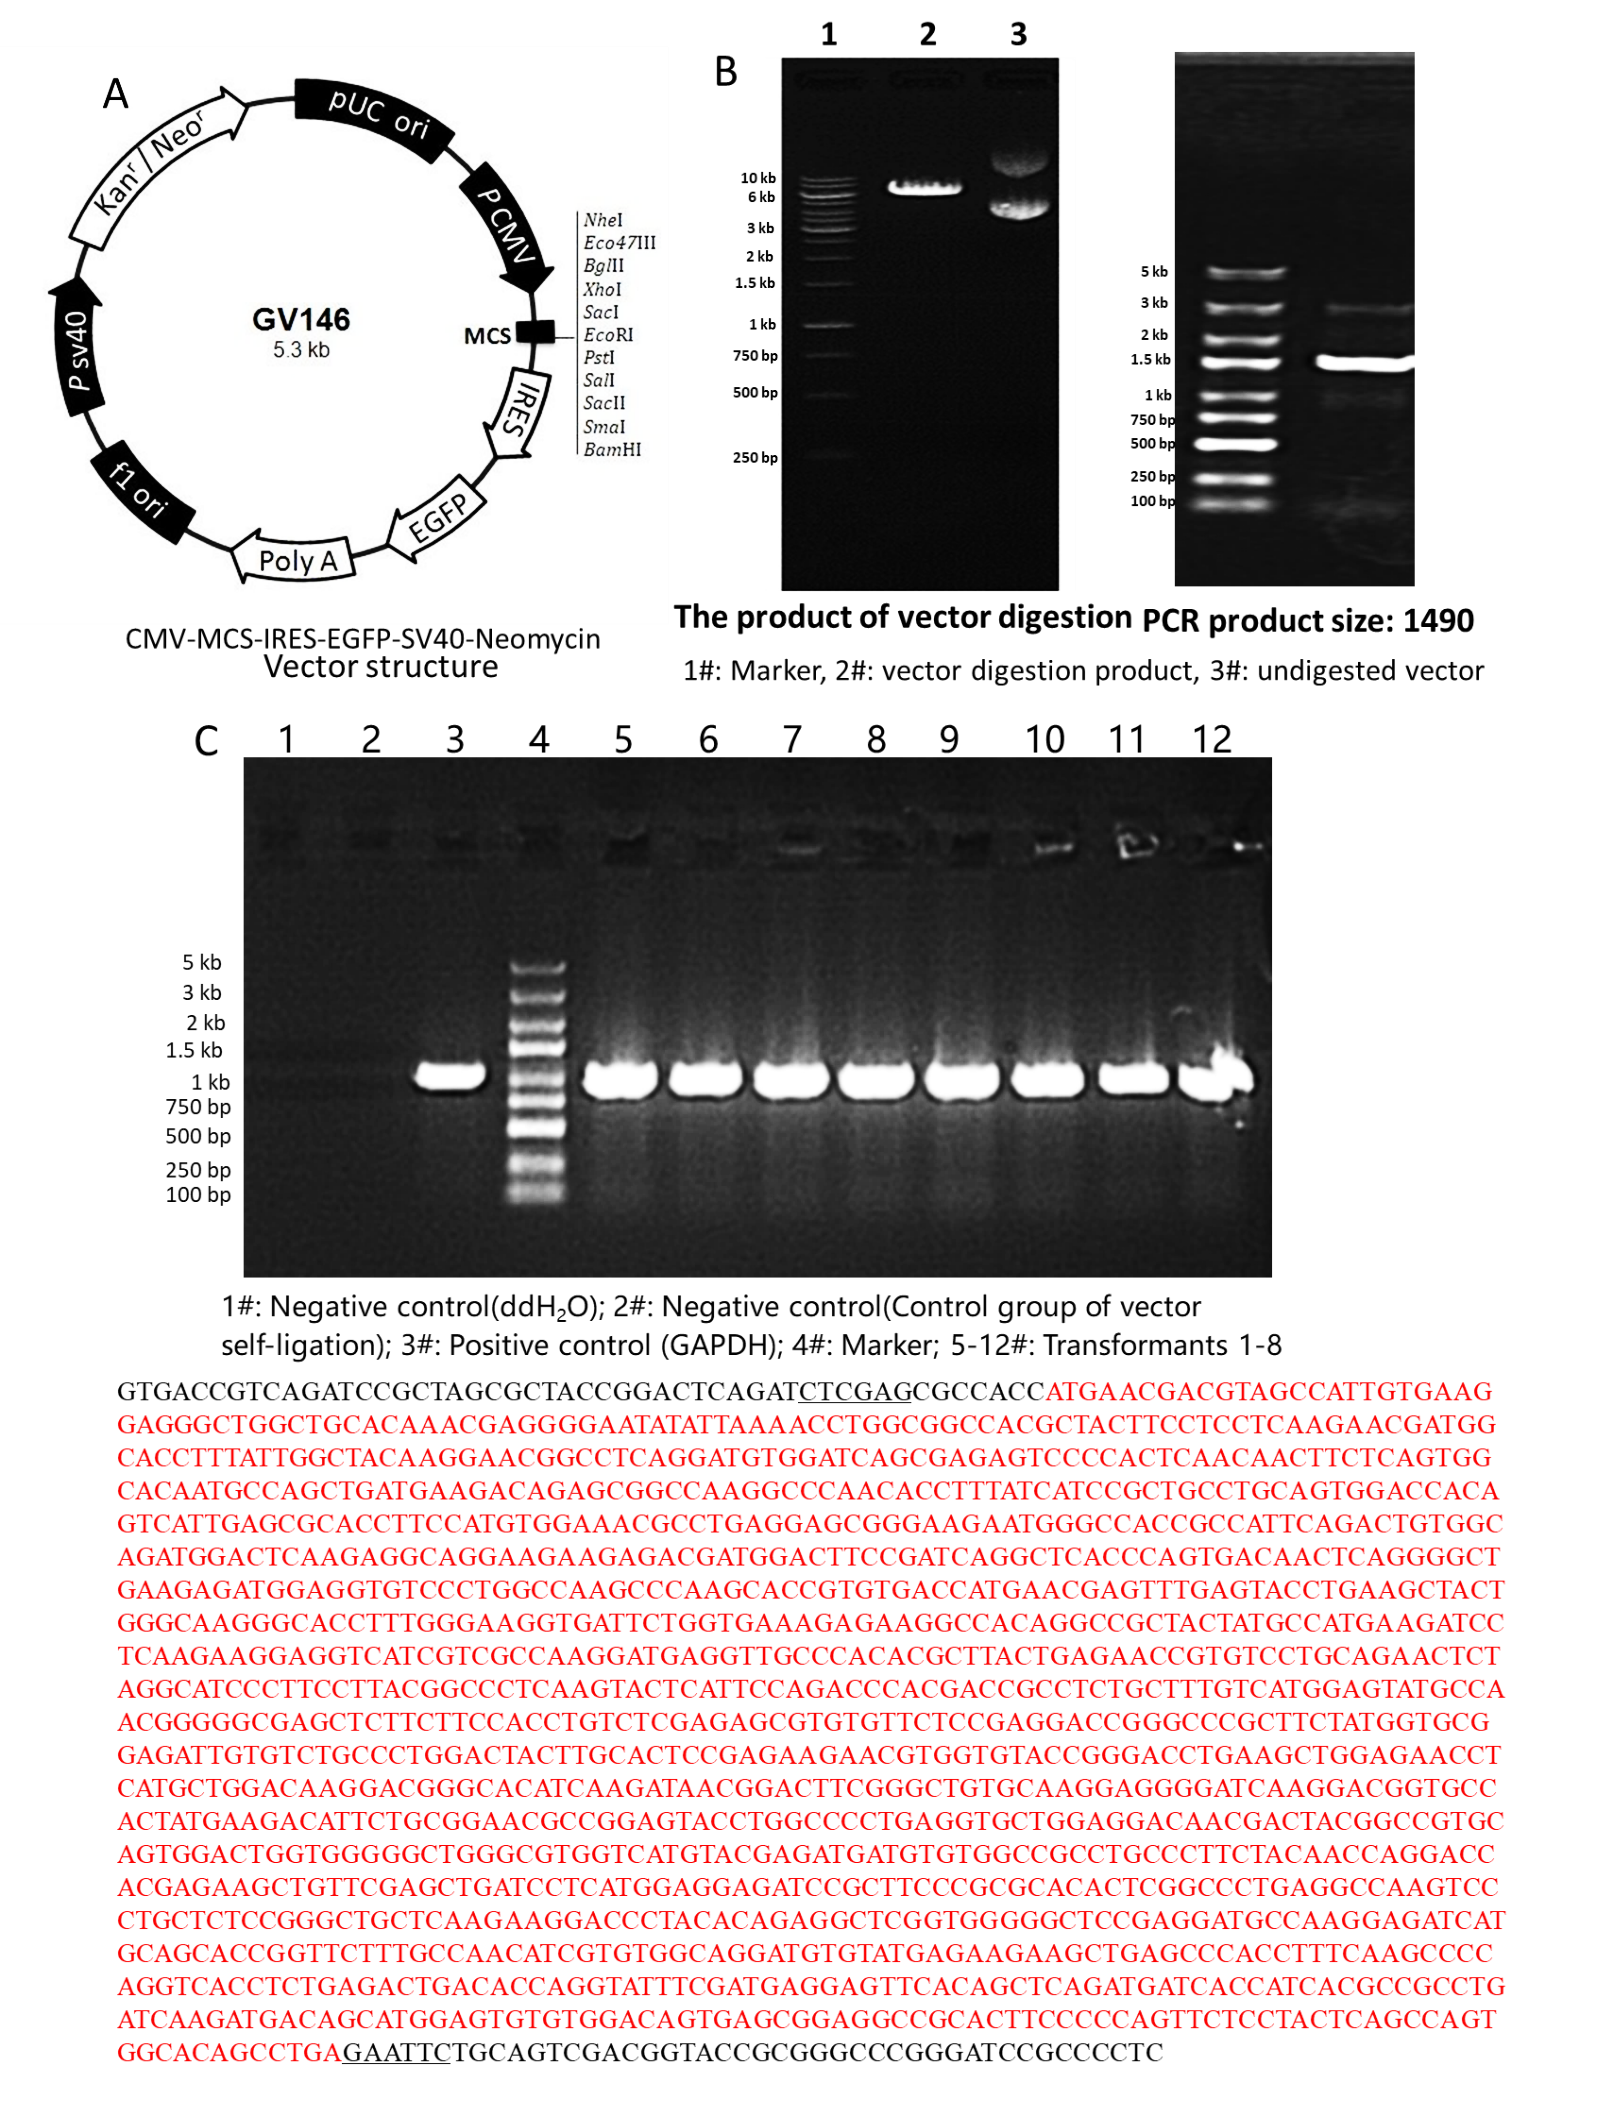


Supplementary Fig.2


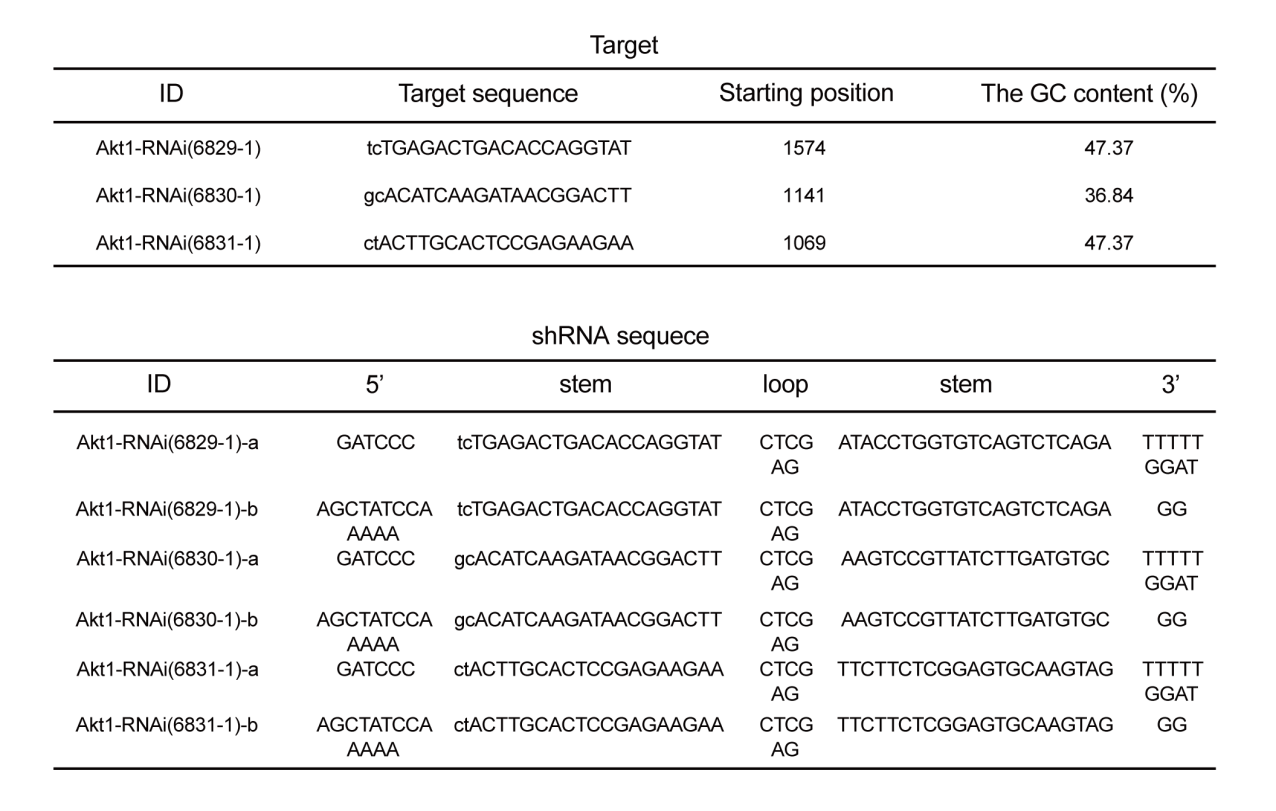


Supplementary Table S1-S2
